# Supplementary figures and images for: A Novel Cosegregating DCTN1 Splice Site Variant in a Family with Bipolar Disorder May Hold the Key to Understanding the Etiology
Source: MDPI journal article supplement (doi:10.3390/genes11040446), 2020-04-18

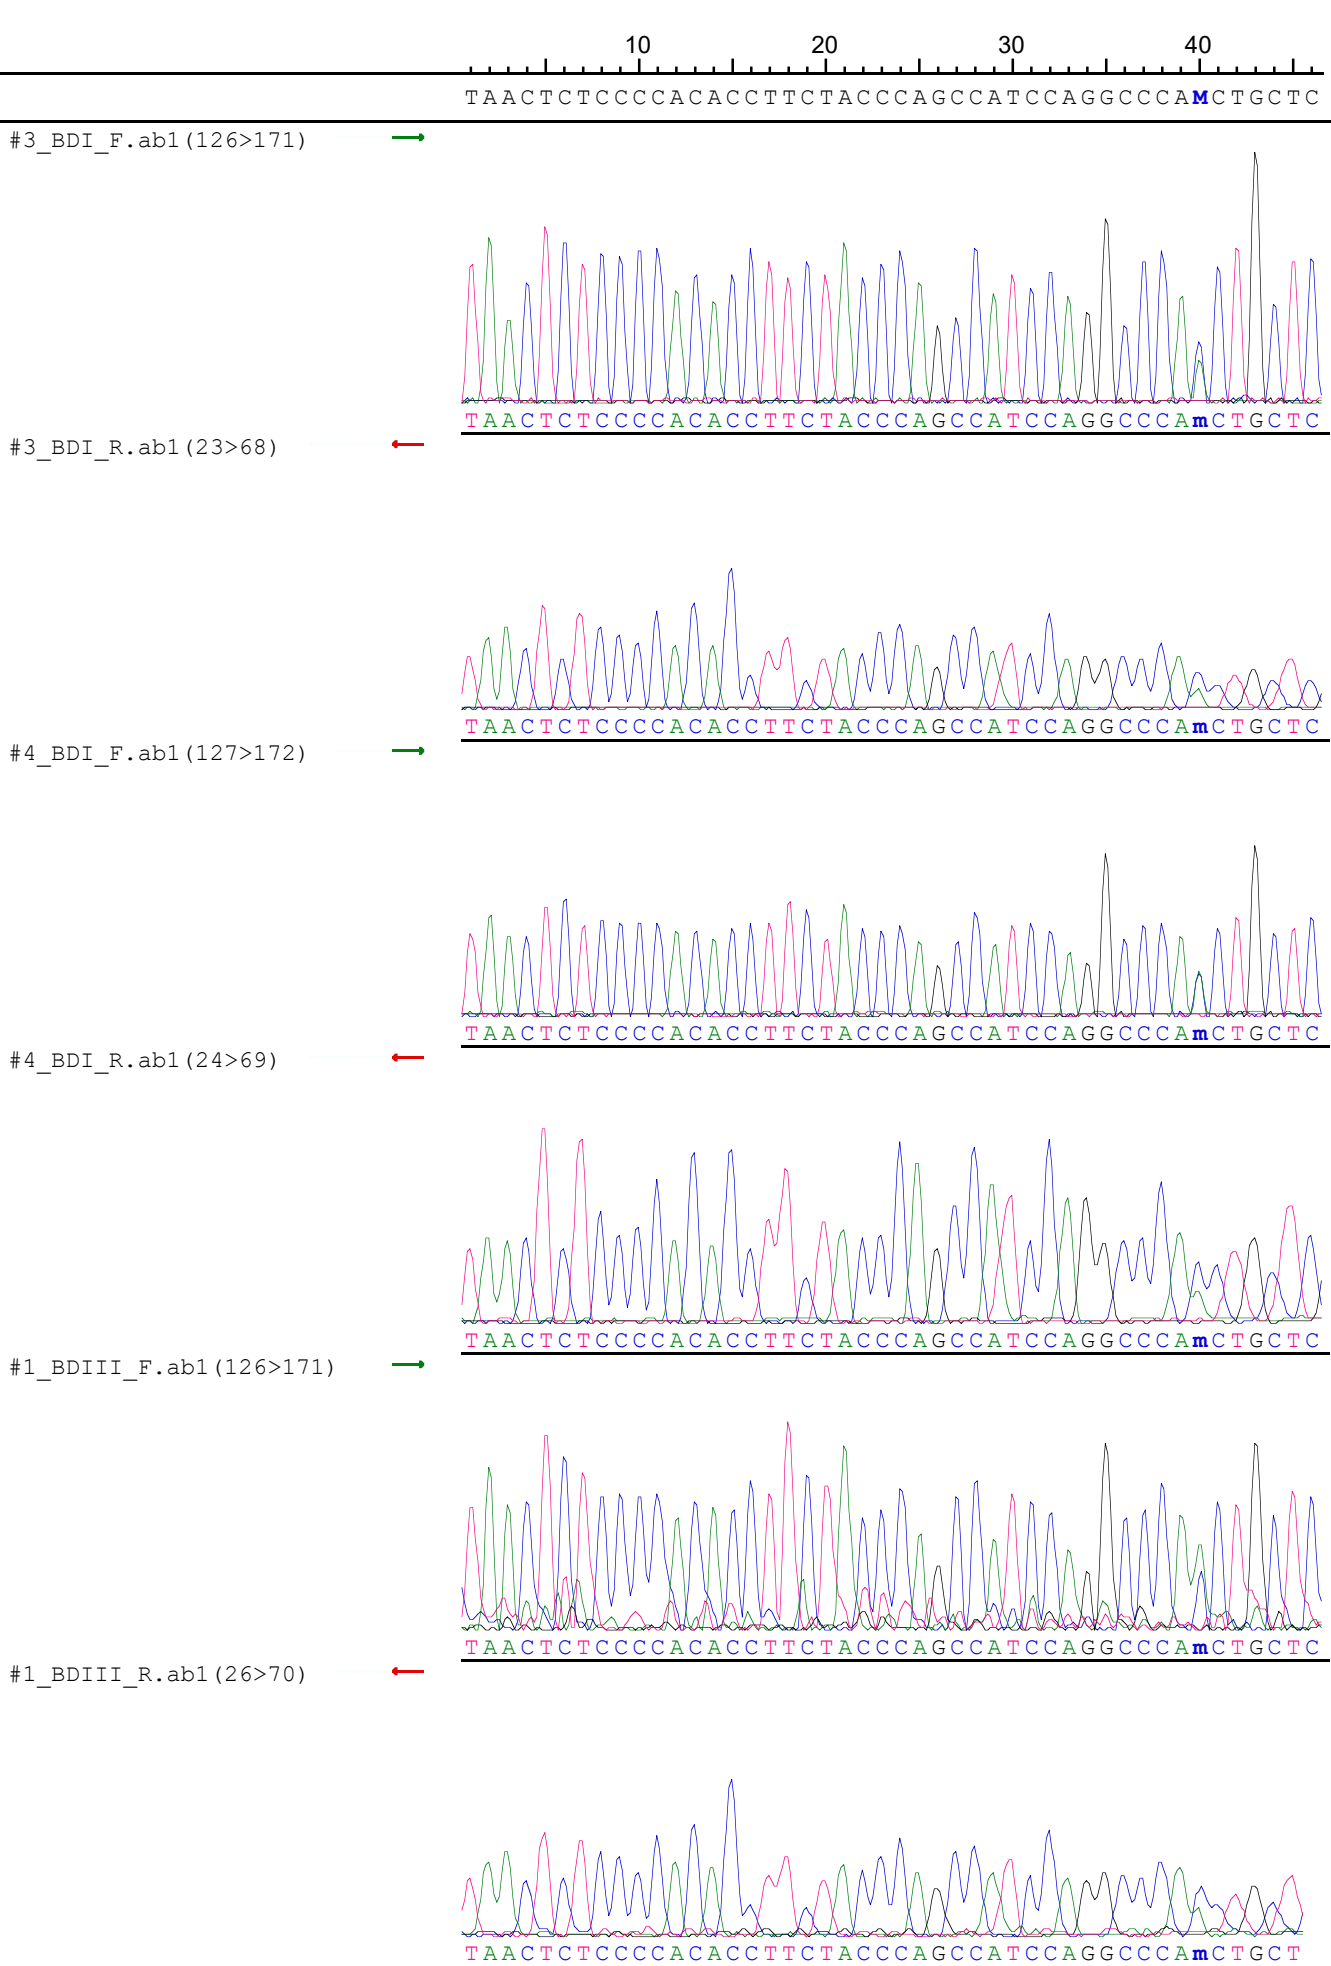

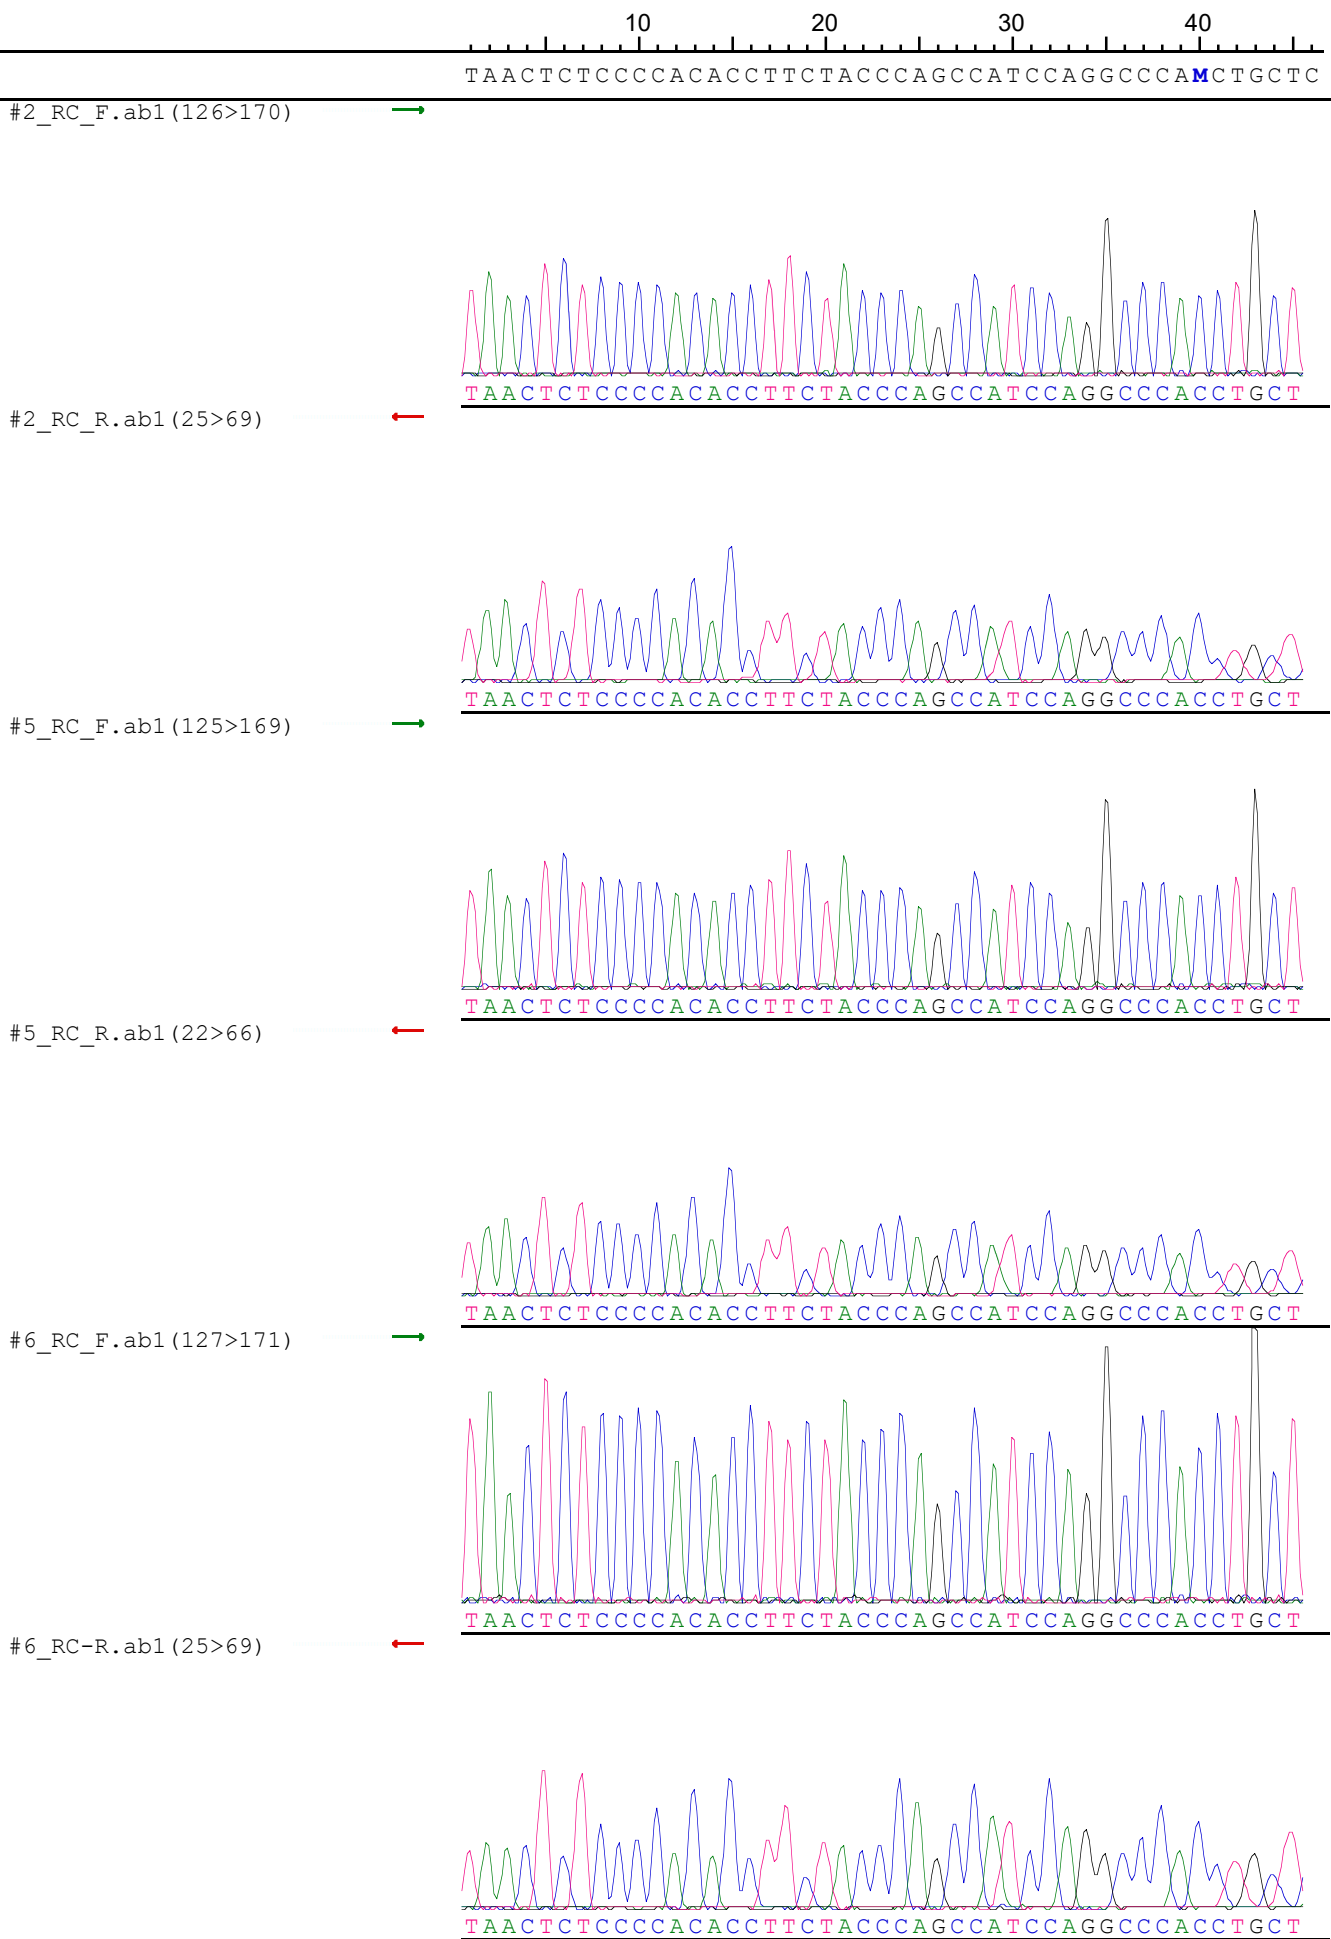

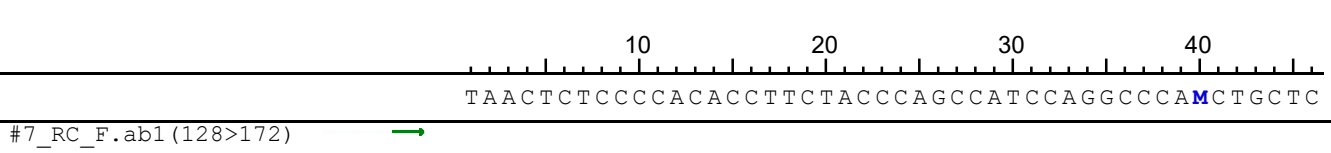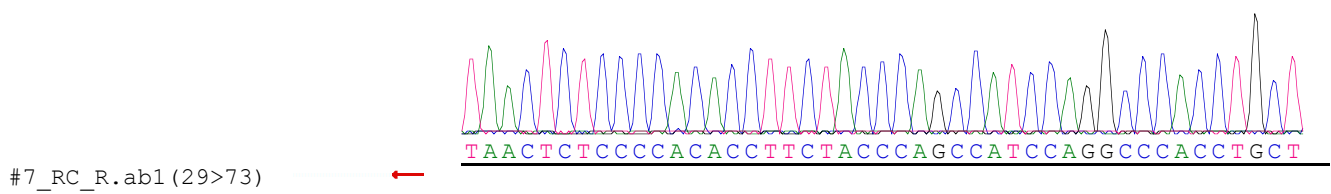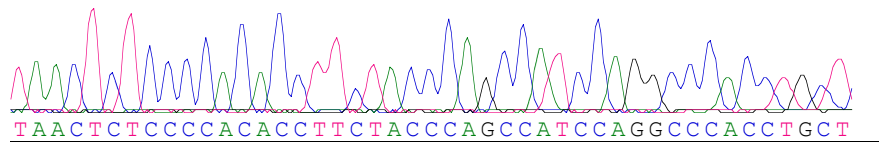

Supplement: s1 [file s1]
